# Supplementary material for: Simultaneous recovery of high-purity copper and polyvinyl chloride from thin electric cables by plasticizer extraction and ball milling
Source: Royal Society of Chemistry journal article supplement (doi:10.1039/c8ra00301g), 2018-01-01
Supplement: c8ra00301g1.pdf [file c8ra00301g1.pdf]

1  
2  
3  
4  
5  
6  
7  
8  
9  
10  
11  
12  
13  
14  
15  
16  
17  
18  
19  
20  
21  
22  
23  
24  
25  
26  
27  
28  
29  
30  
31  
32  
33

## Electronic Supplementary Information (ESI)

# Simultaneous recovery of high-purity copper and polyvinyl chloride from thin electric cables by plasticizer extraction and ball milling

Jing Xu, Naoki Tazawa, Shogo Kumagai\*, Tomohito Kameda, Yuko Saito and

Toshiaki Yoshioka

Graduate School of Environmental Studies, Tohoku University, 6-6-07 Aoba

Aramaki-Aza, Aoba-ku, Sendai, Miyagi 980-8579, Japan.

Email: [kumagai@env.che.tohoku.ac.jp](mailto:kumagai@env.che.tohoku.ac.jp)

34 Detailed conditions for extraction of diisononyl phthalate

35 The total amount of extractable plasticizer (diisononyl phthalate [DINP]) from  
36 electric cables was determined by Soxhlet extraction using diethyl ether at 75 °C for  
37 24 h.<sup>1</sup> After extraction, samples were dried in vacuum at 40 °C overnight. The weight  
38 difference between samples before and after extraction was considered the total  
39 amount of plasticizer in the cables.

40

41

42 <sup>1</sup>H-NMR and <sup>13</sup>C-NMR spectra of plasticizer extracted from cable samples

43

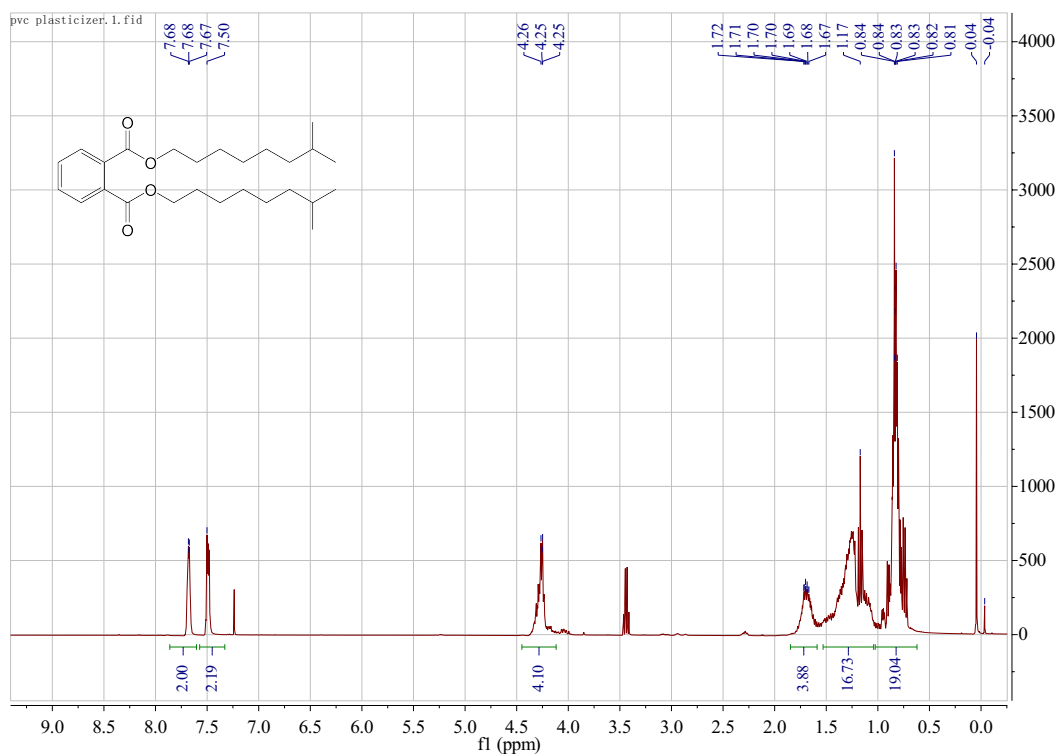

44

45 **Fig. S1** <sup>1</sup>H-NMR of diisononyl phthalate (DINP) extracted from electric cable samples  
46 using diethyl ether solvent.

47

48 DINP (400 MHz, CDCl<sub>3</sub>),  $\delta$  (ppm): 7.68 (2H, H1, dd, 3J1-2 = 5.6 Hz, 4J1-2 = 3.2  
49 Hz), 7.53 (2H, H2, dd, 3J2-1 = 5.6 Hz, 4J2-1 = 3.2 Hz), between 4.44 and 4.40 (around  
50 4H, m), between 2.07 and 0.64 (around 34H, m).

51

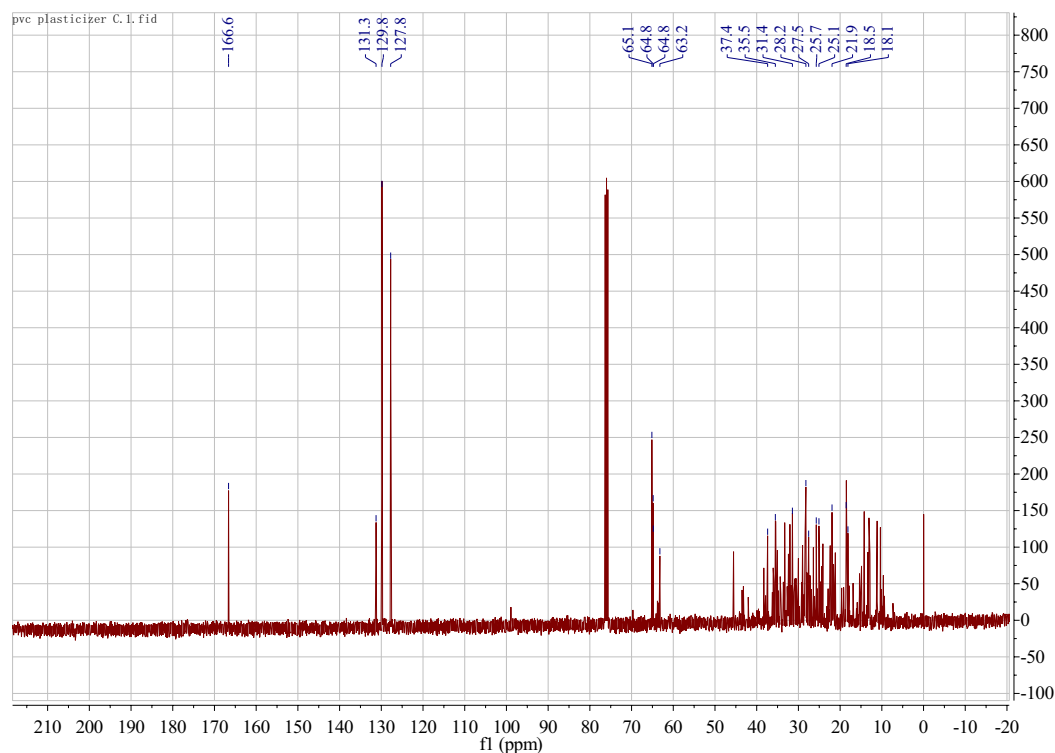

52

53

54 **Fig. S2**  $^{13}\text{C}$ -NMR of DINP extracted from electric cable samples using diethyl ether.

55

56  $^{13}\text{C}$ -NMR (400MHz,  $\text{CDCl}_3$ )  $\delta$ : 166.6, 131.3, 129.8, 127.8, 65.1, 64.8, 63.2, 37.4, 35.5,  
57 31.4, 28.2, 27.5, 25.7, 25.1, 21.9, 18.5, 18.1 .

58

59

60

61

62

63

64

65

66

67

68

69

70

## 71 REFERENCES

72 1. Fonseca, J. D.; Grause, G.; Kameda, T.; Yoshioka, T., Effects of steam on the thermal  
73 dehydrochlorination of poly(vinyl chloride) resin and flexible poly(vinyl chloride) under atmospheric  
74 pressure. *Polym Degrad Stabil* **2015**, 117, 8-15.

75
